# Supplementary material
Source: PubMed Central journal article supplement (PMC4366753)
Supplement: supp_114.221895_221895Supplemental_data.pdf [file supp_114.221895_221895Supplemental_data.pdf]

## Glycine receptors containing $\alpha 2$ or $\alpha 3$ subunits regulate specific ethanol-mediated behaviors

Yuri A. Blednov, Jillian M. Benavidez, Mendy Black, Courtney R. Leiter, Elizabeth Osterndorff-Kahanek, R. Adron Harris  
J Pharmacol Exp Ther

Supplemental Fig. 1

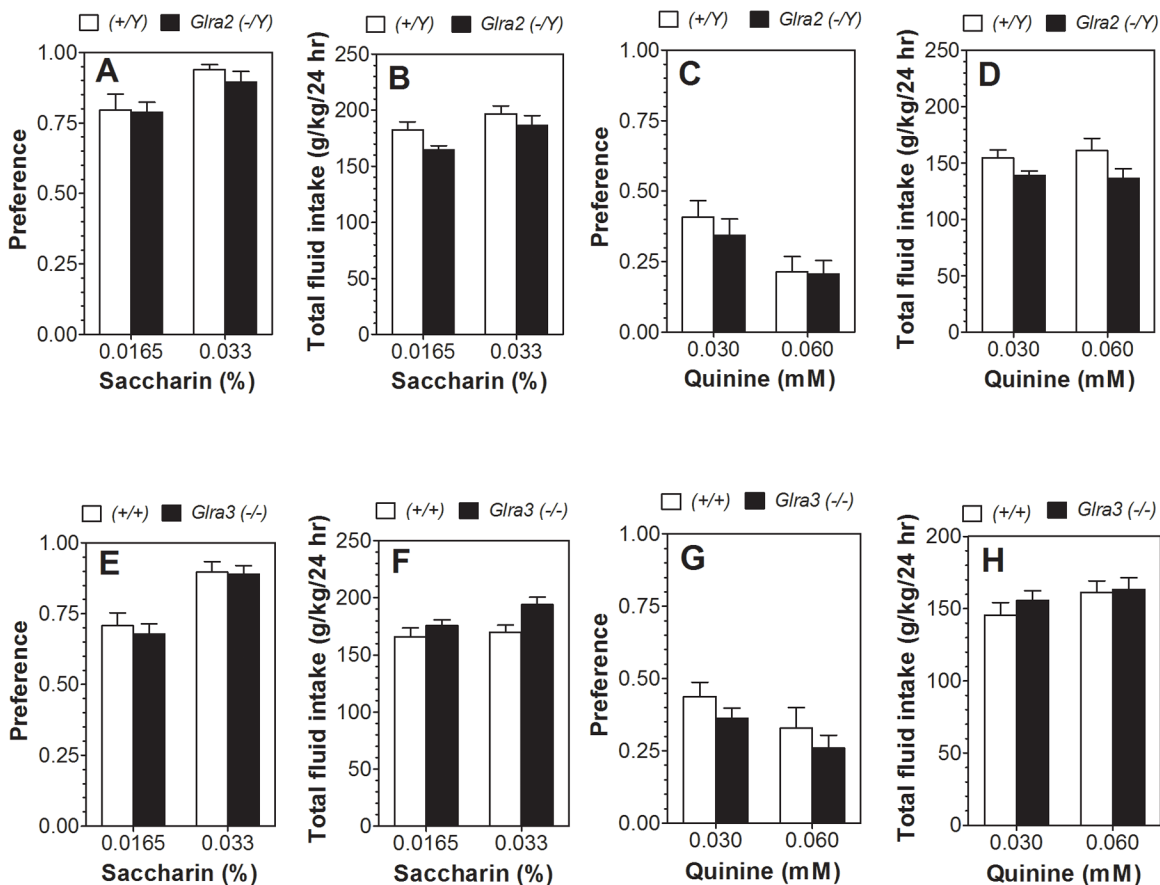

**Supplemental Figure 1. Voluntary saccharin and quinine consumption did not differ in *Glra2* (-/-) or *Glra3* (-/-) and wild type mice in the two-bottle choice test.** A-D. Male *Glra2* (-/-) and wild type mice (n=10 per genotype). E-H. Male *Glra3* (-/-) and wild type mice (n=8-12 per genotype). A,E. Preference for saccharin. B,F. Total fluid intake for saccharin. C,G. Preference for quinine. D,H. Total fluid intake for quinine. Values represent mean  $\pm$  SEM. Data were analyzed by two-way repeated measures ANOVA followed by Bonferroni *post hoc* test.

## Supplemental Fig. 2

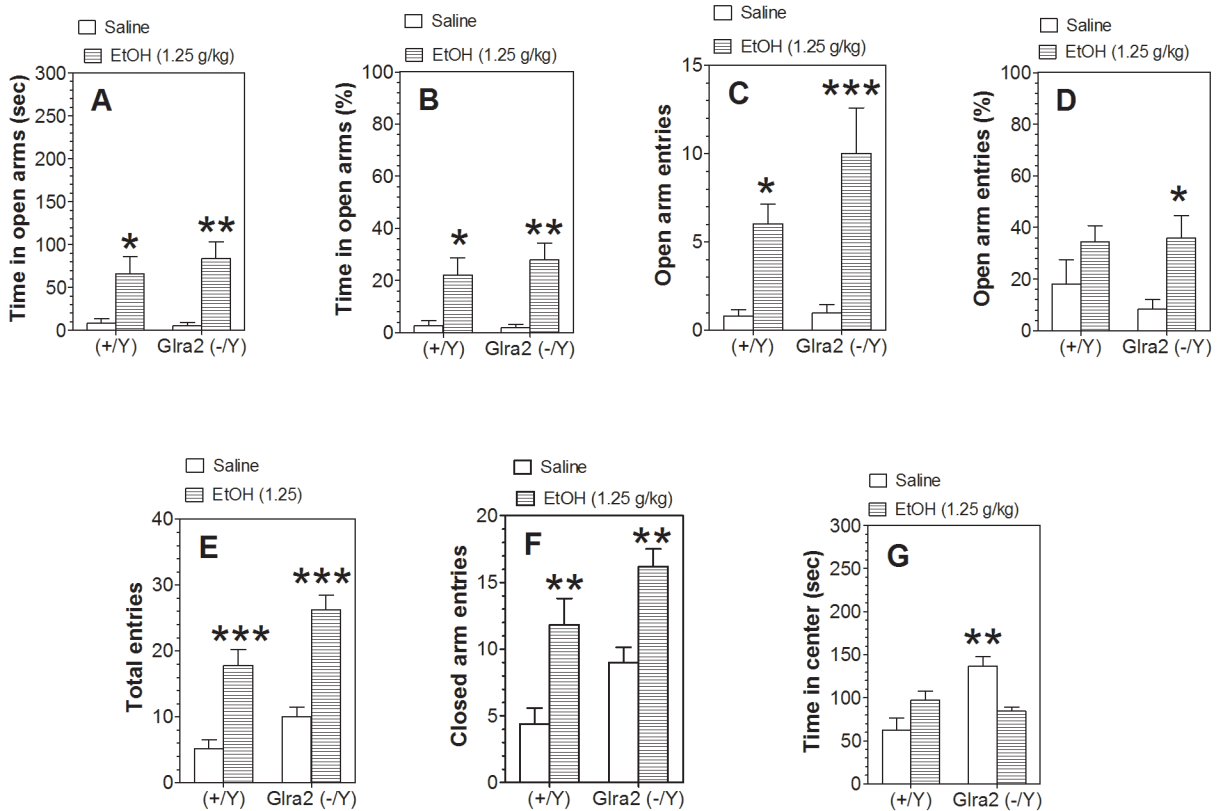

**Supplemental Figure 2. Ethanol reduced anxiety to a similar extent in *Glra2* (-/Y) and wild type mice in the elevated plus-maze test.** A. Time in the open arms expressed in seconds. B. Time in the open arms expressed as percent of total time. C. Number of entries into the open arms. D. Number of entries into the open arms expressed as percent of total number of entries. E. Total number of entries. F. Number of entries into the closed arms. G. Time in the center expressed in seconds. Values represent mean  $\pm$  SEM. Data were analyzed by two-way ANOVA followed by Bonferroni *post hoc* test. \* $P < 0.05$ , \*\* $P < 0.01$ , \*\*\* $P < 0.001$  vs. saline group of corresponding genotype ( $n=5$  per group and genotype). EtOH=1.25 g/kg ethanol.

### Supplemental Fig. 3

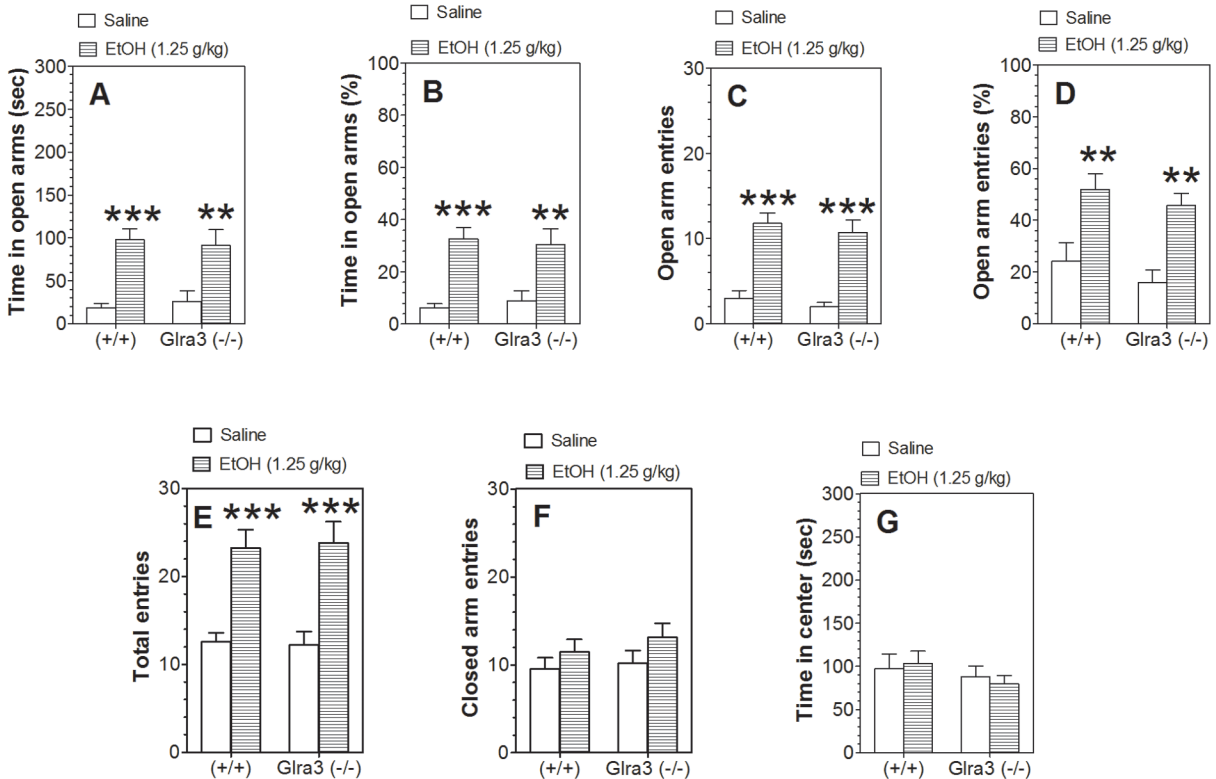

**Supplemental Figure 3. Ethanol reduced anxiety to a similar extent in *Glra3* (-/-) and wild type mice in the elevated plus-maze test.** A. Time in the open arms expressed in seconds. B. Time in the open arms expressed as percent of total time. C. Number of entries into the open arms. D. Number of entries into the open arms expressed as percent of total number of entries. E. Total number of entries. F. Number of entries into the closed arms. G. Time in the center expressed in seconds. Values represent mean  $\pm$  SEM. Data were analyzed by two-way ANOVA followed by Bonferroni *post hoc* test. \*\* $P < 0.01$ , \*\*\* $P < 0.001$  vs. saline group of corresponding genotype (n=10-11 per group and genotype). EtOH=1.25 g/kg ethanol.

## Supplemental Fig. 4

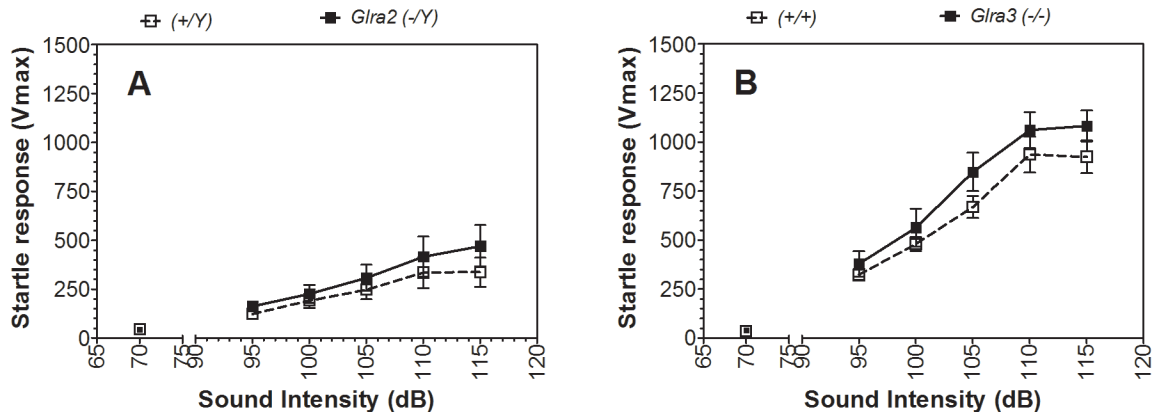

**Supplemental Figure 4. Acoustic startle response is not altered in mutant mice.** Data represent the maximum startle amplitude (Vmax) as a function of sound intensity in decibels (dB). A. Male *Glra2* (-/Y) and wild type mice (n=7 per genotype). B. Male *Glra3* (-/-) and wild type mice (n=9 per genotype). Values represent mean  $\pm$  SEM. Data were analyzed by two-way repeated measures ANOVA followed by Bonferroni *post hoc* test.

## Supplemental Fig. 5

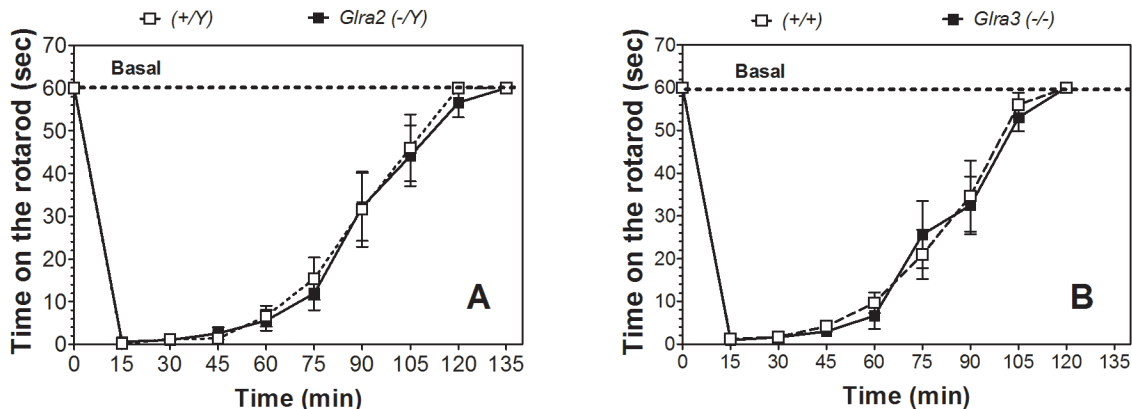

**Supplemental Figure 5. Recovery from ethanol-induced motor incoordination in *Glra2* (-/Y) or *Glra3* (-/-) mice.** Data represent time in seconds (sec) on the rotarod after injection of ethanol (2 g/kg). A. Male *Glra2* (-/Y) vs. wild type mice (n=5 per genotype). B. Male *Glra3* (-/-) vs. wild type mice (n=6 per genotype). Values represent mean  $\pm$  SEM. Data were analyzed by two-way repeated measures ANOVA followed by Bonferroni *post hoc* test.

## Supplemental Fig. 6

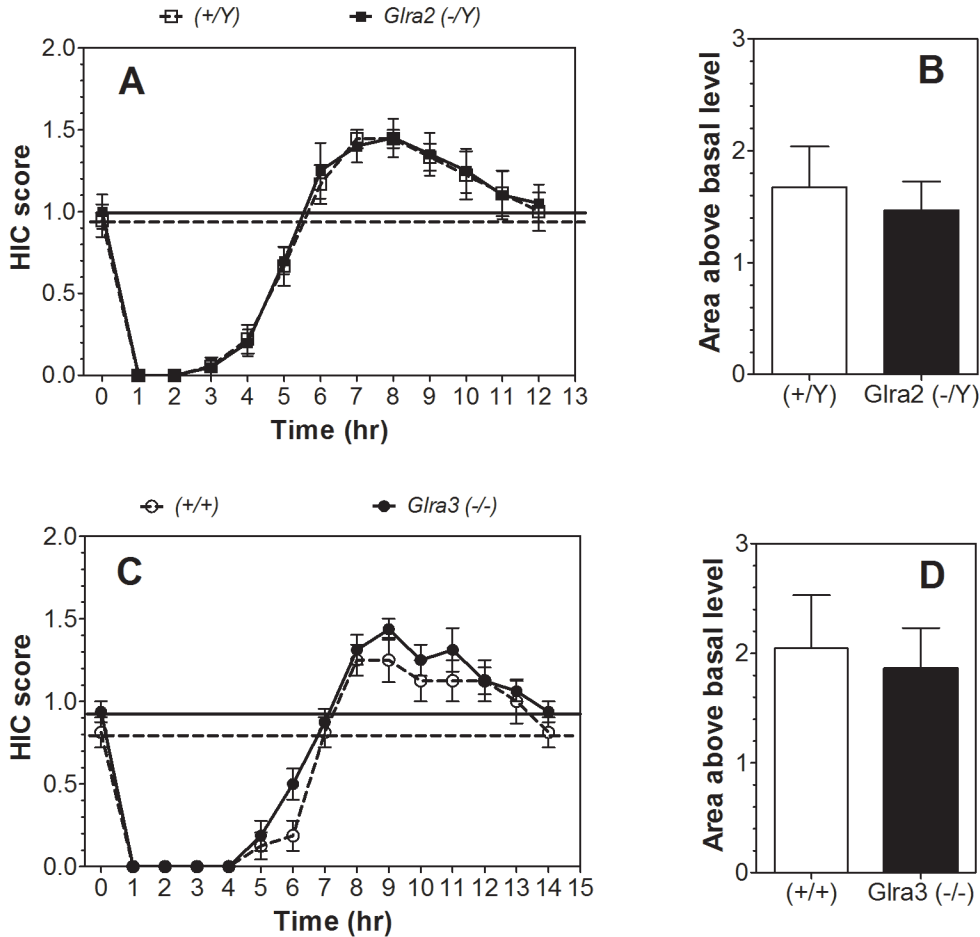

**Supplemental Figure 6. Severity of acute ethanol-induced withdrawal did not differ in *Glra2* (-/-) or *Glra3* (-/-) and wild type mice.** A. HIC score in *Glra2* (-/-) vs. wild type mice. B. Area under the HIC score and above the basal level in *Glra2* (-/-) vs. wild type mice. C. HIC score in *Glra3* (-/-) vs. wild type mice. D. Area under the HIC score and above the basal level in *Glra3* (-/-) vs. wild type mice. The dotted and solid lines represent the average basal HIC scores for wild type and mutant mice, respectively, before administration of ethanol. No differences between the two genotypes were found (Student's t-test). Values represent mean  $\pm$  SEM. (n=12-13 for *Glra2* (-/-) and corresponding wild type and n=8 for *Glra3* (-/-) and corresponding wild type mice). HIC=handling induced convulsions.

## Supplemental Fig. 7

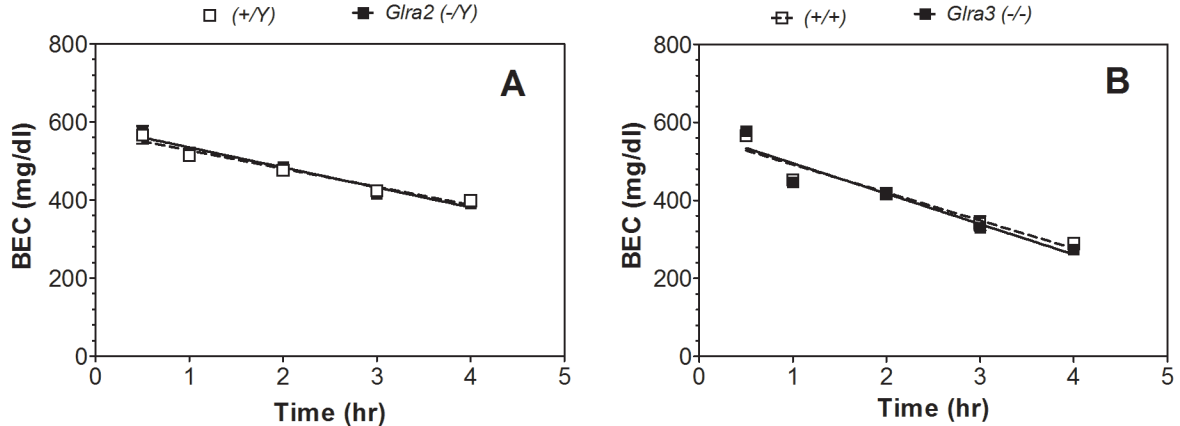

**Supplemental Figure 7. Clearance of ethanol (4 g/kg) in *Glra2* (-/Y) or *Glra3* (-/-) mice.** A. BEC (mg/dl) in *Glra2* (-/Y) vs. wild type mice (n=4 per genotype). B. BEC (mg/dl) in *Glra3* (-/-) vs. wild type mice (n=4 per genotype). Values represent mean  $\pm$  SEM. Data were analyzed by two-way repeated measures ANOVA followed by Bonferroni *post hoc* test. BEC=blood ethanol concentration.

**Supplemental Table 1. Statistical analyses of ethanol intake in the two-bottle choice test in *Gira2* (-/Y) and *Gira3* (-/-) mice.**

| Strain                           | Factors       | Two-bottle choice                       |                                 |                                 |
|----------------------------------|---------------|-----------------------------------------|---------------------------------|---------------------------------|
|                                  |               | Amount of ethanol consumed (g/kg/24 hr) | Preference                      | Total fluid intake (g/kg/24 hr) |
| <i>Gira2</i> (-/Y)<br>(n = 9-10) | Genotype      | <b>F(1,17)=10.3; p&lt;0.01</b>          | <b>F(1,17)=5.8; p&lt;0.05</b>   | F(1,17)=3.3; p>0.05             |
|                                  | Concentration | <b>F(4,68)=49.6; p&lt;0.001</b>         | <b>F(4,68)=33.5; p&lt;0.001</b> | <b>F(4,68)=22.7; p&lt;0.001</b> |
|                                  | Interaction   | <b>F(4,68)=3.4; p&lt;0.05</b>           | F(4,68)=2.3; p>0.05             | F(4,68)=1.5; p>0.05             |
| <i>Gira3</i> (-/-)<br>(n = 8-12) | Genotype      | F(1,18)=0.7; p>0.05                     | F(1,18)=0.1; p>0.05             | F(1,18)=0.4; p>0.05             |
|                                  | Concentration | <b>F(4,72)=48.3; p&lt;0.001</b>         | <b>F(4,72)=20.7; p&lt;0.001</b> | <b>F(4,72)=16.4; p&lt;0.001</b> |
|                                  | Interaction   | F(4,72)=0.7; p>0.05                     | F(4,72)=0.8; p>0.05             | F(4,72)=1.1; p>0.05             |

Statistically significant results are shown in bold font (two-way ANOVA).



**Supplemental Table 2. Statistical analyses of saccharin and quinine intake in the two-bottle choice test in *Gira2* (-/Y) and *Gira3* (-/-) mice.**

| Tastant   | Strain                           | Factors       | Preference                       | Total fluid intake (g/kg/24 hr) |
|-----------|----------------------------------|---------------|----------------------------------|---------------------------------|
| Saccharin | <i>Gira2</i> (-/Y)<br>(n = 10)   | Genotype      | F(1,18)=0.3; p>0.05              | F(1,18)=2.6; p>0.05             |
|           |                                  | Concentration | <b>F(1,18)=13.6; p&lt;0.01</b>   | <b>F(1,18)=17.3; p&lt;0.001</b> |
|           |                                  | Interaction   | F(1,18)=2.3; p>0.05              | F(1,18)=0.8; p>0.05             |
|           | <i>Gira3</i> (-/-)<br>(n = 8-12) | Genotype      | F(1,18)=0.1; p>0.05              | <b>F(1,18)=4.7; p&lt;0.05</b>   |
|           |                                  | Concentration | <b>F(1,18)=124.6; p&lt;0.001</b> | <b>F(1,18)=4.9; p&lt;0.05</b>   |
|           |                                  | Interaction   | F(1,18)=0.4; p>0.05              | F(1,18)=2.0; p>0.05             |
| Quinine   | <i>Gira2</i> (-/Y)<br>(n = 10)   | Genotype      | F(1,18)=0.3; p>0.05              | F(1,18)=3.9; p>0.05             |
|           |                                  | Concentration | <b>F(1,18)=17.6; p&lt;0.001</b>  | F(1,18)=0.2; p>0.05             |
|           |                                  | Interaction   | F(1,18)=0.5; p>0.05              | F(1,18)=0.7; p>0.05             |
|           | <i>Gira3</i> (-/-)<br>(n = 8-12) | Genotype      | F(1,18)=1.3; p>0.05              | F(1,18)=0.3; p>0.05             |
|           |                                  | Concentration | <b>F(1,18)=10.9; p&lt;0.01</b>   | <b>F(1,18)=5.6; p&lt;0.05</b>   |
|           |                                  | Interaction   | F(1,18)=0.1; p>0.05              | F(1,18)=0.7; p>0.05             |

Statistically significant results are shown in bold font (two-way ANOVA).

**Supplemental Table 3. Statistical analyses of ethanol intake in the two-bottle choice test with intermittent access to ethanol in *Gira2* (-/Y) and *Gira3* (-/-) mice.**

| Strain                           | Concentration of ethanol | Factors     | Two-bottle choice (intermittent access) |                                     |                                    |
|----------------------------------|--------------------------|-------------|-----------------------------------------|-------------------------------------|------------------------------------|
|                                  |                          |             | Amount of ethanol consumed (g/kg/24 hr) | Preference                          | Total fluid intake (g/kg/24 hr)    |
| <i>Gira2</i> (-/Y)<br>(n = 9-10) | 15%                      | Genotype    | F(1,28)=0.8<br>p>0.05                   | F(1,28)=0.63<br>p>0.05              | F(1,28)=0.13<br>p>0.05             |
|                                  |                          | Time        | <b>F(5,140)=2.8<br/>p&lt;0.05</b>       | <b>F(5,140)=2.4<br/>p&lt;0.05</b>   | F(5,140)=1.5<br>p>0.05             |
|                                  |                          | Interaction | F(5,140)=0.7<br>p>0.05                  | F(5,140)=1.1<br>p>0.05              | F(5,140)=1.6<br>p>0.05             |
|                                  | 20%                      | Genotype    | F(1,28)=0.9<br>p>0.05                   | F(1,28)=0.63<br>p>0.05              | F(1,28)=0.1<br>p>0.05              |
|                                  |                          | Time        | <b>F(5,140)=2.8<br/>p&lt;0.05</b>       | <b>F(5,140)=2.6<br/>p&lt;0.05</b>   | <b>F(5,140)=1.7<br/>p&lt;0.05</b>  |
|                                  |                          | Interaction | F(5,140)=0.1<br>p>0.05                  | F(5,140)=0.2<br>p>0.05              | F(5,140)=0.7<br>p>0.05             |
| <i>Gira3</i> (-/-)<br>(n = 8-12) | 15%                      | Genotype    | <b>F(1,27)=4.3<br/>p&lt;0.05</b>        | <b>F(1,27)=7.7<br/>p&lt;0.05</b>    | <b>F(1,27)=8.1<br/>p&lt;0.01</b>   |
|                                  |                          | Time        | <b>F(5,135)=13.9<br/>p&lt;0.001</b>     | <b>F(5,135)=13.7<br/>p&lt;0.001</b> | F(5,135)=1.3<br>p>0.05             |
|                                  |                          | Interaction | <b>F(5,135)=4.2<br/>p&lt;0.01</b>       | <b>F(5,135)=4.6<br/>p&lt;0.001</b>  | F(5,135)=1.3<br>p>0.05             |
|                                  | 20%                      | Genotype    | F(1,27)=1.3<br>p>0.05                   | <b>F(1,27)=4.2<br/>p&lt;0.05</b>    | <b>F(1,27)=9.8<br/>p&lt;0.01</b>   |
|                                  |                          | Time        | <b>F(5,135)=3.1<br/>p&lt;0.05</b>       | <b>F(5,135)=2.3<br/>p&lt;0.05</b>   | <b>F(5,135)=4.4<br/>p&lt;0.001</b> |
|                                  |                          | Interaction | F(5,135)=9.2<br>p>0.05                  | F(5,135)=1.7<br>p>0.05              | F(5,135)=1.0<br>p>0.05             |

Statistically significant results are shown in bold font (two-way ANOVA).

**Supplemental Table 4. Statistical analyses of ethanol-induced conditioned taste aversion in *Gira2* (-/Y) mice.**

|                       |                     | Wild type          |                                    | <i>Gira2</i> (-/Y)                  |                                     |  |
|-----------------------|---------------------|--------------------|------------------------------------|-------------------------------------|-------------------------------------|--|
|                       |                     | Saline<br>(n = 20) | Ethanol<br>2.5 g/kg<br>(n = 22)    | Saline<br>(n = 20)                  | Ethanol<br>2.5 g/kg<br>(n = 23)     |  |
| <i>Gira2</i><br>(-/Y) | Saline              | Genotype           | F(1,38)=1.7<br>p>0.05              |                                     |                                     |  |
|                       |                     | Trial              | <b>F(4,152)=7.1<br/>p&lt;0.001</b> |                                     |                                     |  |
|                       |                     | Interaction        | F(4,152)=0.5<br>p>0.05             |                                     |                                     |  |
|                       | Ethanol<br>2.5 g/kg | Treatment          |                                    |                                     | <b>F(1,41)=41.8<br/>p&lt;0.001</b>  |  |
|                       |                     | Trial              |                                    |                                     | <b>F(4,164)=17.5<br/>p&lt;0.001</b> |  |
|                       |                     | Interaction        |                                    |                                     | <b>F(4,164)=7.4<br/>p&lt;0.001</b>  |  |
| Wild<br>type          | Saline              | Treatment          |                                    | <b>F(1,40)=17.8<br/>p&lt;0.001</b>  |                                     |  |
|                       |                     | Trial              |                                    | <b>F(4,160)=28.1<br/>p&lt;0.001</b> |                                     |  |
|                       |                     | Interaction        |                                    | <b>F(4,160)=12.1<br/>p&lt;0.001</b> |                                     |  |
|                       | Ethanol<br>2.5 g/kg | Genotype           |                                    |                                     | F(1,43)=1.0<br>p>0.05               |  |
|                       |                     | Trial              |                                    |                                     | <b>F(4,172)=58.2<br/>p&lt;0.001</b> |  |
|                       |                     | Interaction        |                                    |                                     | F(4,172)=1.1<br>p>0.05              |  |

Statistically significant results are shown in bold font (two-way ANOVA).

**Supplemental Table 5. Statistical analyses of ethanol-induced conditioned taste aversion in *Gira3* (-/-) mice.**

|                       |                     | Wild type   |                        |                                    | <i>Gira3</i> (-/-)                  |                                     |
|-----------------------|---------------------|-------------|------------------------|------------------------------------|-------------------------------------|-------------------------------------|
|                       |                     | Factors     | Saline<br>(n = 15)     | Ethanol 2.5 g/kg<br>(n = 14)       | Saline<br>(n = 15)                  | Ethanol 2.5 g/kg<br>(n = 15)        |
| <i>Gira3</i><br>(-/-) | Saline              | Genotype    | F(1,28)=0.1<br>p>0.05  |                                    |                                     |                                     |
|                       |                     | Trial       | F(4,112)=0.9<br>p>0.05 |                                    |                                     |                                     |
|                       |                     | Interaction | F(4,112)=2.1<br>p>0.05 |                                    |                                     |                                     |
|                       | Ethanol<br>2.5 g/kg | Treatment   |                        |                                    | <b>F(1,28)=19.7<br/>p&lt;0.001</b>  |                                     |
|                       |                     | Trial       |                        |                                    | <b>F(4,112)=10.4<br/>p&lt;0.001</b> |                                     |
|                       |                     | Interaction |                        |                                    | <b>F(4,112)=11.7<br/>p&lt;0.001</b> |                                     |
| Wild<br>type          | Saline              | Treatment   |                        | <b>F(1,27)=4.3<br/>p&lt;0.05</b>   |                                     |                                     |
|                       |                     | Trial       |                        | <b>F(4,108)=8.2<br/>p&lt;0.001</b> |                                     |                                     |
|                       |                     | Interaction |                        | <b>F(4,108)=3.0<br/>p&lt;0.05</b>  |                                     |                                     |
|                       | Ethanol<br>2.5 g/kg | Genotype    |                        |                                    |                                     | <b>F(1,27)=9.4<br/>p&lt;0.01</b>    |
|                       |                     | Trial       |                        |                                    |                                     | <b>F(4,108)=20.2<br/>p&lt;0.001</b> |
|                       |                     | Interaction |                        |                                    |                                     | F(4,108)=1.4<br>p>0.05              |

Statistically significant results are shown in bold font (two-way ANOVA).

**Supplemental Table 6. Statistical analyses of lithium chloride-induced conditioned taste aversion in *Gra2* (-/Y) mice.**

|                      |                  | Wild type         |                                         | <i>Gra2</i> (-/Y)                        |                                          |  |
|----------------------|------------------|-------------------|-----------------------------------------|------------------------------------------|------------------------------------------|--|
|                      |                  | Saline<br>(n = 9) | LiCl (6 mEq/kg)<br>(n = 9)              | Saline<br>(n = 9)                        | LiCl (6 mEq/kg)<br>(n = 9)               |  |
| <i>Gra2</i><br>(-/Y) | Saline           | Genotype          | F(1,16)=2.8<br>p>0.05                   |                                          |                                          |  |
|                      |                  | Trial             | <b>F(4,64)=7.4</b><br><b>p&lt;0.001</b> |                                          |                                          |  |
|                      |                  | Interaction       | F(4,64)=1.6<br>p>0.05                   |                                          |                                          |  |
|                      | LiCl<br>6 mEq/kg | Treatment         |                                         |                                          | <b>F(1,16)=28.8</b><br><b>p&lt;0.001</b> |  |
|                      |                  | Trial             |                                         |                                          | <b>F(4,64)=12.6</b><br><b>p&lt;0.001</b> |  |
|                      |                  | Interaction       |                                         |                                          | <b>F(4,64)=10.3</b><br><b>p&lt;0.001</b> |  |
| Wild<br>type         | Saline           | Treatment         |                                         | <b>F(1,16)=24.5</b><br><b>p&lt;0.001</b> |                                          |  |
|                      |                  | Trial             |                                         | <b>F(4,64)=27.7</b><br><b>p&lt;0.001</b> |                                          |  |
|                      |                  | Interaction       |                                         | <b>F(4,64)=20.9</b><br><b>p&lt;0.001</b> |                                          |  |
|                      | LiCl<br>6 mEq/kg | Genotype          |                                         |                                          | F(1,16)=0.1<br>p>0.05                    |  |
|                      |                  | Trial             |                                         |                                          | <b>F(4,64)=45.3</b><br><b>p&lt;0.001</b> |  |
|                      |                  | Interaction       |                                         |                                          | F(4,64)=1.5<br>p>0.05                    |  |

Statistically significant results are shown in bold font (two-way ANOVA).

**Supplemental Table 7. Statistical analyses of lithium chloride (6 mEq/kg)-induced conditioned taste aversion in *Gira3* (-/-) mice.**

|                       |                  | Wild type   |                        |                                    | <i>Gira3</i> (-/-)                |                                    |
|-----------------------|------------------|-------------|------------------------|------------------------------------|-----------------------------------|------------------------------------|
|                       |                  | Factors     | Saline<br>(n = 7)      | LiCl (6 mEq/kg)<br>(n = 10)        | Saline<br>(n = 5)                 | LiCl (6 mEq/kg)<br>(n = 7)         |
| <i>Gira3</i><br>(-/-) | Saline           | Genotype    | F(1,26)=0.3<br>p>0.05  |                                    |                                   |                                    |
|                       |                  | Trial       | F(4,104)=0.5<br>p>0.05 |                                    |                                   |                                    |
|                       |                  | Interaction | F(4,104)=0.3<br>p>0.05 |                                    |                                   |                                    |
|                       | LiCl<br>6 mEq/kg | Treatment   |                        |                                    | <b>F(1,16)=4.5<br/>p&lt;0.05</b>  |                                    |
|                       |                  | Trial       |                        |                                    | <b>F(4,64)=9.1<br/>p&lt;0.001</b> |                                    |
|                       |                  | Interaction |                        |                                    | <b>F(4,64)=7.8<br/>p&lt;0.001</b> |                                    |
| Wild<br>type          | Saline           | Treatment   |                        | <b>F(1,25)=4.7<br/>p&lt;0.05</b>   |                                   |                                    |
|                       |                  | Trial       |                        | <b>F(4,100)=7.4<br/>p&lt;0.001</b> |                                   |                                    |
|                       |                  | Interaction |                        | <b>F(4,100)=6.9<br/>p&lt;0.001</b> |                                   |                                    |
|                       | LiCl<br>6 mEq/kg | Genotype    |                        |                                    |                                   | F(1,15)=0.8<br>p>0.05              |
|                       |                  | Trial       |                        |                                    |                                   | <b>F(4,60)=18.0<br/>p&lt;0.001</b> |
|                       |                  | Interaction |                        |                                    |                                   | F(4,60)=1.0<br>p>0.05              |

Statistically significant results are shown in bold font (two-way ANOVA).

**Supplemental Table 8. Statistical analyses of lithium chloride (10 mEq/kg)-induced conditioned taste aversion in *Gira3* (-/-) mice.**

|                       |                   | Wild type   |                        |                                    | <i>Gira3</i> (-/-)               |                                   |
|-----------------------|-------------------|-------------|------------------------|------------------------------------|----------------------------------|-----------------------------------|
|                       |                   | Factors     | Saline<br>(n = 7)      | LiCl (10 mEq/kg)<br>(n = 10)       | Saline<br>(n = 5)                | LiCl (10 mEq/kg)<br>(n = 7)       |
| <i>Gira3</i><br>(-/-) | Saline            | Genotype    | F(1,26)=0.3<br>p>0.05  |                                    |                                  |                                   |
|                       |                   | Trial       | F(4,104)=0.5<br>p>0.05 |                                    |                                  |                                   |
|                       |                   | Interaction | F(4,104)=0.3<br>p>0.05 |                                    |                                  |                                   |
|                       | LiCl<br>10 mEq/kg | Treatment   |                        |                                    | <b>F(1,17)=7.8<br/>p&lt;0.05</b> |                                   |
|                       |                   | Trial       |                        |                                    | F(4,68)=0.6<br>p>0.05            |                                   |
|                       |                   | Interaction |                        |                                    | F(4,68)=0.3<br>p>0.05            |                                   |
| Wild<br>type          | Saline            | Treatment   |                        | <b>F(1,23)=34.3<br/>p&lt;0.001</b> |                                  |                                   |
|                       |                   | Trial       |                        | <b>F(4,92)=8.2<br/>p&lt;0.001</b>  |                                  |                                   |
|                       |                   | Interaction |                        | <b>F(4,92)=9.2<br/>p&lt;0.001</b>  |                                  |                                   |
|                       | LiCl<br>10 mEq/kg | Genotype    |                        |                                    |                                  | <b>F(1,14)=10.0<br/>p&lt;0.01</b> |
|                       |                   | Trial       |                        |                                    |                                  | <b>F(4,56)=5.3<br/>p&lt;0.01</b>  |
|                       |                   | Interaction |                        |                                    |                                  | <b>F(4,56)=3.6<br/>p&lt;0.05</b>  |

Statistically significant results are shown in bold font (two-way ANOVA).
